# Supplementary material
Source: publisher site journal article supplement (https://www.dovepress.com/article/214081)
Supplement: Supplementary file 1 [file get_supplementary_file.php]

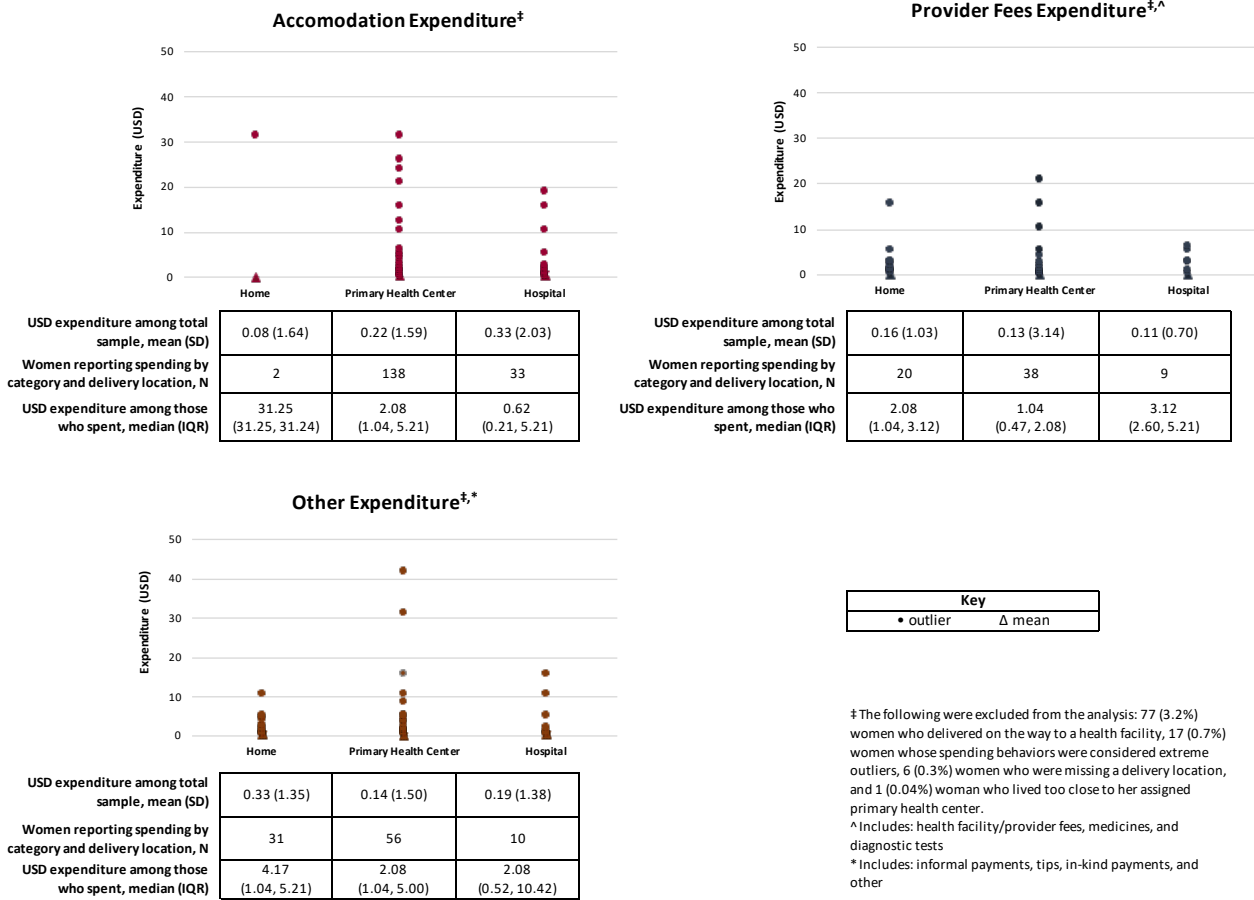

Figure S1

**Table S1.** Predictors of any expenditure (Total Expenditure>0) for delivery sub-categories and a linear regression of the natural log of total expenditure by women living ≥10 km from their assigned primary health center who spent money on their delivery for baby clothes, delivery supplies, or transportation#

| Variable                    | Baby Clothes / Blanket                          |                   |                                                 |                                    |                                             |                      | Delivery Supplies                            |                   |                                              |                                    |                                             |                      | Transportation                            |                     |                                            |                                    |                                             |                      |        |
|-----------------------------|-------------------------------------------------|-------------------|-------------------------------------------------|------------------------------------|---------------------------------------------|----------------------|----------------------------------------------|-------------------|----------------------------------------------|------------------------------------|---------------------------------------------|----------------------|-------------------------------------------|---------------------|--------------------------------------------|------------------------------------|---------------------------------------------|----------------------|--------|
|                             | Odds ratio for baby clothes/blanket expenditure |                   | Natural log of baby clothes/blanket expenditure |                                    |                                             |                      | Odds ratio for delivery supplies expenditure |                   | Natural log of delivery supplies expenditure |                                    |                                             |                      | Odds ratio for transportation expenditure |                     | Natural log of transportation expenditure  |                                    |                                             |                      |        |
|                             | Adjusted odds ratios <sup>1</sup>               | p-value           | Adjusted coefficient (95% CI) <sup>2</sup>      | p-value                            | Adjusted effect (USD) (95% CI) <sup>2</sup> | p-value              | Adjusted odds ratios <sup>1</sup>            | p-value           | Adjusted coefficient (95% CI) <sup>2</sup>   | p-value                            | Adjusted effect (USD) (95% CI) <sup>2</sup> | p-value              | Adjusted odds ratios <sup>1</sup>         | p-value             | Adjusted coefficient (95% CI) <sup>2</sup> | p-value                            | Adjusted effect (USD) (95% CI) <sup>2</sup> | p-value              |        |
| Women's Age                 | 15-19                                           | 1.26 (0.56, 2.83) | 0.568                                           | -0.01 (-0.09, 0.07)                | 0.750                                       | -0.13 (-1.16, 0.98)  | 0.750                                        | 0.90 (0.57, 1.42) | 0.657                                        | -0.04 (-0.18, 0.10)                | 0.608                                       | -0.19 (-0.78, 0.50)  | 0.608                                     | 1.46 (1.03, 2.06)   | 0.033                                      | -0.02 (-0.22, 0.17)                | 0.822                                       | -0.13 (-1.29, 1.21)  | 0.822  |
|                             | 20-24                                           | 1.00              | 1.00                                            | 1.00                               | 1.00                                        | 1.00                 | 1.00                                         | 1.00              | 1.00                                         | 1.00                               | 1.00                                        | 1.00                 | 1.00                                      | 1.00                | 1.00                                       | 1.00                               | 1.00                                        | 1.00                 | 1.00   |
|                             | 25-29                                           | 0.89 (0.45, 1.78) | 0.742                                           | 0.01 (-0.06, 0.08)                 | 0.704                                       | 0.13 (-0.78, 1.12)   | 0.704                                        | 0.95 (0.66, 1.38) | 0.790                                        | 0.04 (-0.09, 0.17)                 | 0.551                                       | 0.19 (-0.41, 0.88)   | 0.551                                     | 1.54 (1.14, 2.07)   | 0.005                                      | 0.14 (-0.04, 0.32)                 | 0.132                                       | 0.98 (-0.26, 2.47)   | 0.132  |
|                             | 30-34                                           | 0.79 (0.38, 1.64) | 0.526                                           | 0.02 (-0.05, 0.09)                 | 0.550                                       | 0.27 (-0.66, 1.27)   | 0.550                                        | 0.75 (0.49, 1.13) | 0.167                                        | 0.09 (-0.08, 0.25)                 | 0.310                                       | 0.45 (-0.36, 1.35)   | 0.310                                     | 1.48 (1.08, 2.04)   | 0.015                                      | 0.09 (-0.10, 0.27)                 | 0.360                                       | 0.62 (-0.62, 2.03)   | 0.360  |
|                             | 35+                                             | 1.09 (0.45, 2.64) | 0.847                                           | 0.05 (-0.02, 0.13)                 | 0.170                                       | 0.69 (-0.27, 1.87)   | 0.170                                        | 0.95 (0.63, 1.43) | 0.807                                        | -0.08 (-0.22, 0.06)                | 0.276                                       | -0.36 (-0.94, 0.29)  | 0.276                                     | 1.24 (0.90, 1.70)   | 0.183                                      | 0.08 (-0.13, 0.30)                 | 0.435                                       | 0.54 (-0.80, 2.29)   | 0.435  |
| Education                   | None                                            | 1.89 (0.92, 3.90) | 0.083                                           | -0.12 (-0.19, -0.04)               | 0.002                                       | -1.52 (-2.33, -0.53) | 0.002                                        | 1.52 (1.08, 2.14) | 0.015                                        | 0.14 (-0.03, 0.31)                 | 0.105                                       | 0.71 (-0.14, 1.73)   | 0.105                                     | 0.86 (0.62, 1.18)   | 0.348                                      | -0.16 (-0.32, -0.01)               | 0.038                                       | -0.97 (-1.79, -0.06) | 0.038  |
|                             | Any primary                                     | 1.00              | 1.00                                            | 1.00                               | 1.00                                        | 1.00                 | 1.00                                         | 1.00              | 1.00                                         | 1.00                               | 1.00                                        | 1.00                 | 1.00                                      | 1.00                | 1.00                                       | 1.00                               | 1.00                                        | 1.00                 | 1.00   |
|                             | More than Primary                               | 1.17 (0.61, 2.23) | 0.633                                           | 0.15 (0.09, 0.21)                  | <0.001                                      | 2.18 (1.27, 3.15)    | <0.001                                       | 1.20 (0.86, 1.68) | 0.272                                        | -0.01 (-0.13, 0.11)                | 0.853                                       | -0.05 (-0.58, 0.55)  | 0.853                                     | 1.22 (0.98, 1.53)   | 0.080                                      | 0.05 (-0.09, 0.19)                 | 0.472                                       | 0.34 (-0.56, 1.37)   | 0.472  |
| Marital Status              | Never married                                   | 0.66 (0.28, 1.57) | 0.345                                           | -0.07 (-0.17, 0.03)                | 0.308                                       | -0.91 (-2.10, 0.41)  | 0.308                                        | 1.11 (0.66, 1.88) | 0.687                                        | 0.04 (-0.20, 0.28)                 | 0.765                                       | 0.19 (-0.86, 1.54)   | 0.765                                     | 0.94 (0.61, 1.45)   | 0.784                                      | -0.06 (-0.35, 0.23)                | 0.68                                        | -0.38 (-1.93, 1.69)  | 0.68   |
|                             | Divorced/separated/<br>widowed                  | 0.76 (0.33, 1.74) | 0.515                                           | -0.01 (-0.11, 0.09)                | 0.785                                       | -0.13 (-1.40, 1.27)  | 0.785                                        | 1.58 (0.87, 2.85) | 0.131                                        | -0.02 (-0.20, 0.16)                | 0.853                                       | -0.09 (-0.86, 0.82)  | 0.853                                     | 0.92 (0.57, 1.50)   | 0.743                                      | -0.25 (-0.42, -0.08)               | 0.004                                       | -1.45 (-2.25, -0.50) | 0.004  |
|                             | Married/cohabiting                              | 1.00              | 1.00                                            | 1.00                               | 1.00                                        | 1.00                 | 1.00                                         | 1.00              | 1.00                                         | 1.00                               | 1.00                                        | 1.00                 | 1.00                                      | 1.00                | 1.00                                       | 1.00                               | 1.00                                        | 1.00                 | 1.00   |
| Wealth Index                | 1 (lowest)                                      | 0.55 (0.29, 1.02) | 0.059                                           | -0.07 (-0.13, 0.00)                | 0.045                                       | -0.91 (-1.64, 0.00)  | 0.045                                        | 0.76 (0.53, 1.07) | 0.117                                        | -0.19 (-0.32, -0.06)               | 0.004                                       | -0.82 (-1.30, -0.28) | 0.004                                     | 0.92 (0.68, 1.28)   | 0.640                                      | -0.12 (-0.31, 0.07)                | 0.214                                       | -0.74 (-1.75, 0.47)  | 0.214  |
|                             | 2                                               | 1.00              | 1.00                                            | 1.00                               | 1.00                                        | 1.00                 | 1.00                                         | 1.00              | 1.00                                         | 1.00                               | 1.00                                        | 1.00                 | 1.00                                      | 1.00                | 1.00                                       | 1.00                               | 1.00                                        | 1.00                 | 1.00   |
|                             | 3                                               | 0.92 (0.45, 1.86) | 0.800                                           | 0.06 (0.00, 0.12)                  | 0.664                                       | 0.83 (0.00, 1.72)    | 0.664                                        | 1.47 (1.02, 2.12) | 0.038                                        | 0.01 (-0.14, 0.16)                 | 0.868                                       | 0.05 (-0.62, 0.82)   | 0.868                                     | 1.38 (1.02, 1.87)   | 0.036                                      | 0.10 (-0.06, 0.26)                 | 0.232                                       | 0.69 (-0.38, 1.94)   | 0.232  |
|                             | 4 (highest)                                     | 1.72 (0.78, 3.73) | 0.179                                           | 0.15 (0.08, 0.23)                  | <0.001                                      | 2.18 (1.12, 3.48)    | <0.001                                       | 1.81 (1.24, 2.63) | 0.002                                        | 0.05 (-0.12, 0.21)                 | 0.587                                       | 0.24 (-0.54, 1.11)   | 0.587                                     | 1.55 (1.13, 2.13)   | 0.006                                      | 0.15 (-0.02, 0.31)                 | 0.080                                       | 1.06 (-0.13, 2.38)   | 0.080  |
| District                    | Kalomo                                          | 0.83 (0.34, 1.92) | 0.657                                           | 0.24 (0.14, 0.34)                  | <0.001                                      | 3.65 (2.02, 5.45)    | <0.001                                       | 0.35 (0.22, 0.55) | <0.001                                       | -0.10 (-0.30, 0.10)                | 0.312                                       | -0.45 (-1.23, 0.50)  | 0.312                                     | 2.66 (1.78, 3.97)   | <0.001                                     | 0.34 (0.02, 0.66)                  | 0.034                                       | 2.65 (0.13, 6.13)    | 0.034  |
|                             | Choma/Pemba                                     | 1.05 (0.47, 2.30) | 0.912                                           | 0.27 (0.18, 0.36)                  | <0.001                                      | 4.17 (2.65, 5.83)    | <0.001                                       | 0.91 (0.58, 1.43) | 0.681                                        | -0.07 (-0.24, 0.10)                | 0.428                                       | -0.32 (-1.01, 0.50)  | 0.428                                     | 3.07 (2.15, 4.39)   | <0.001                                     | 0.49 (0.23, 0.75)                  | <0.001                                      | 4.14 (1.69, 7.32)    | <0.001 |
|                             | Lundazi                                         | 1.00              | 1.00                                            | 1.00                               | 1.00                                        | 1.00                 | 1.00                                         | 1.00              | 1.00                                         | 1.00                               | 1.00                                        | 1.00                 | 1.00                                      | 1.00                | 1.00                                       | 1.00                               | 1.00                                        | 1.00                 | 1.00   |
|                             | Nyimba                                          | 0.48 (0.19, 1.17) | 0.107                                           | 0.41 (0.32, 0.50)                  | <0.001                                      | 6.82 (5.08, 8.73)    | <0.001                                       | 0.13 (0.07, 0.25) | <0.001                                       | -0.21 (-0.44, 0.01)                | 0.059                                       | -0.90 (-1.69, 0.19)  | 0.059                                     | 14.11 (8.51, 23.04) | <0.001                                     | 0.57 (0.32, 0.82)                  | <0.001                                      | 5.03 (2.47, 8.33)    | <0.001 |
|                             | Mansa/Chembe                                    | 0.99 (0.39, 2.52) | 0.984                                           | 0.67 (0.57, 0.76)                  | <0.001                                      | 12.85 (10.34, 15.32) | <0.001                                       | 0.84 (0.53, 1.34) | 0.472                                        | 0.08 (-0.07, 0.23)                 | 0.285                                       | 0.40 (-0.32, 1.23)   | 0.285                                     | 3.95 (2.57, 6.07)   | <0.001                                     | 0.19 (-0.10, 0.48)                 | 0.206                                       | 1.37 (-0.62, 4.04)   | 0.206  |
| Primegravida                | No                                              | 1.00              | 1.00                                            | 1.00                               | 1.00                                        | 1.00                 | 1.00                                         | 1.00              | 1.00                                         | 1.00                               | 1.00                                        | 1.00                 | 1.00                                      | 1.00                | 1.00                                       | 1.00                               | 1.00                                        | 1.00                 | 1.00   |
|                             | Yes                                             | 0.70 (0.31, 1.61) | 0.406                                           | 0.06 (-0.01, 0.14)                 | 0.080                                       | 0.83 (-0.13, 2.02)   | 0.080                                        | 1.05 (0.68, 1.64) | 0.814                                        | 0.06 (-0.07, 0.18)                 | 0.379                                       | 0.29 (-0.32, 0.94)   | 0.379                                     | 0.900 (0.67, 1.27)  | 0.549                                      | 0.14 (-0.04, 0.32)                 | 0.136                                       | 0.98 (-0.26, 2.47)   | 0.136  |
| Four or more ANC visits     | No                                              | 0.62 (0.37, 1.05) | 0.075                                           | -0.04 (-0.10, 0.01)                | 0.092                                       | -0.53 (-1.28, 0.13)  | 0.092                                        | 0.90 (0.70, 1.17) | 0.432                                        | -0.08 (-0.18, 0.01)                | 0.088                                       | -0.36 (-0.78, 0.05)  | 0.088                                     | 1.13 (0.91, 1.41)   | 0.273                                      | 0.01 (-0.11, 0.13)                 | 0.917                                       | 0.06 (-0.68, 0.91)   | 0.917  |
|                             | Yes                                             | 1.00              | 1.00                                            | 1.00                               | 1.00                                        | 1.00                 | 1.00                                         | 1.00              | 1.00                                         | 1.00                               | 1.00                                        | 1.00                 | 1.00                                      | 1.00                | 1.00                                       | 1.00                               | 1.00                                        | 1.00                 | 1.00   |
| Saved for delivery          | No                                              | 0.25 (0.15, 0.40) | <0.001                                          | -0.23 (-0.31, -0.16)               | <0.001                                      | -2.77 (-3.59, -1.99) | <0.001                                       | 0.47 (0.35, 0.63) | <0.001                                       | -0.01 (-0.14, 0.13)                | 0.919                                       | -0.05 (-0.62, 0.66)  | 0.919                                     | 0.49 (0.36, 0.67)   | <0.001                                     | -0.33 (-0.49, -0.16)               | <0.001                                      | -1.84 (-2.54, -0.97) | <0.001 |
|                             | Yes                                             | 1.00              | 1.00                                            | 1.00                               | 1.00                                        | 1.00                 | 1.00                                         | 1.00              | 1.00                                         | 1.00                               | 1.00                                        | 1.00                 | 1.00                                      | 1.00                | 1.00                                       | 1.00                               | 1.00                                        | 1.00                 | 1.00   |
| Season of delivery          | Rainy                                           | 1.00              | 1.00                                            | 1.00                               | 1.00                                        | 1.00                 | 1.00                                         | 1.00              | 1.00                                         | 1.00                               | 1.00                                        | 1.00                 | 1.00                                      | 1.00                | 1.00                                       | 1.00                               | 1.00                                        | 1.00                 | 1.00   |
|                             | Dry                                             | 0.48 (0.29, 0.80) | 0.005                                           | 0.03 (-0.02, 0.08)                 | 0.21                                        | 0.41 (-0.27, 1.12)   | 0.21                                         | 0.93 (0.70, 1.24) | 0.641                                        | -0.04 (-0.13, 0.06)                | 0.432                                       | -0.19 (-0.58, 0.29)  | 0.432                                     | 1.13 (0.91, 1.39)   | 0.265                                      | -0.05 (-0.18, 0.07)                | 0.400                                       | -0.32 (-1.08, 0.47)  | 0.400  |
| Distance from health center | 9.5 - 10                                        | 0.90 (0.33, 2.47) | 0.838                                           | -0.08 (-0.19, 0.03)                | 0.171                                       | -1.03 (-2.33, 0.41)  | 0.171                                        | 0.61 (0.36, 1.02) | 0.058                                        | 0.04 (-0.12, 0.21)                 | 0.585                                       | 0.19 (-0.54, 1.11)   | 0.585                                     | 0.84 (0.47, 1.50)   | 0.554                                      | -0.05 (-0.23, 0.13)                | 0.573                                       | -0.32 (-1.35, 0.91)  | 0.573  |
|                             | 10 - 14.9                                       | 1.00              | 1.00                                            | 1.00                               | 1.00                                        | 1.00                 | 1.00                                         | 1.00              | 1.00                                         | 1.00                               | 1.00                                        | 1.00                 | 1.00                                      | 1.00                | 1.00                                       | 1.00                               | 1.00                                        | 1.00                 | 1.00   |
|                             | 15 - 19.9                                       | 0.86 (0.39, 1.91) | 0.716                                           | 0.01 (-0.09, 0.10)                 | 0.875                                       | 0.13 (-1.16, 1.41)   | 0.875                                        | 1.07 (0.70, 1.63) | 0.757                                        | 0.02 (-0.11, 0.16)                 | 0.735                                       | 0.10 (-0.49, 0.82)   | 0.735                                     | 1.14 (0.77, 1.72)   | 0.498                                      | -0.14 (-0.34, 0.06)                | 0.166                                       | -0.86 (-1.89, 0.40)  | 0.166  |
|                             | 20 - 24.9                                       | 1.18 (0.53, 2.63) | 0.683                                           | 0.01 (-0.08, 0.10)                 | 0.808                                       | 0.13 (-1.03, 1.41)   | 0.808                                        | 1.03 (0.67, 1.59) | 0.879                                        | -0.02 (-0.16, 0.12)                | 0.775                                       | -0.09 (-0.70, 0.61)  | 0.775                                     | 1.39 (0.91, 2.14)   | 0.126                                      | -0.11 (-0.31, 0.08)                | 0.250                                       | -0.68 (-1.75, 0.54)  | 0.250  |
|                             | 25+                                             | 1.36 (0.43, 4.33) | 0.838                                           | 0.03 (-0.08, 0.14)                 | 0.599                                       | 0.41 (1.03, 2.02)    | 0.599                                        | 0.74 (0.41, 1.36) | 0.334                                        | -0.03 (-0.30, 0.23)                | 0.816                                       | -0.14 (-1.23, 1.23)  | 0.816                                     | 1.41 (0.90, 2.21)   | 0.128                                      | -0.05 (-0.30, 0.19)                | 0.670                                       | -0.32 (-1.70, 1.37)  | 0.670  |
|                             |                                                 |                   |                                                 | Intercept: 2.60<br>p-value: <0.001 |                                             |                      |                                              |                   |                                              | Intercept: 1.56<br>p-value: <0.001 |                                             |                      |                                           |                     |                                            | Intercept: 1.88<br>p-value: <0.001 |                                             |                      |        |

# The following were excluded from the analysis: 77 (3.2%) women who delivered on the way to a health facility, 17 (0.7%) women whose spending behaviors were considered extreme outliers, 6 (0.3%) women who were missing a delivery location, and 1 (0.04%) woman who lived too close to her assigned primary health center.

<sup>1</sup> Adjusted for all variables shown in Table 3

<sup>2</sup> Adjusted for all variables shown in Table 3 and delivery location (Table 4)

95% CI = 95% Confidence Interval
